# Supplementary material for: Sulfur-inserted polymer-anchored edge exfoliated graphite for durable positive electrodes for lithium–sulfur batteries
Source: Royal Society of Chemistry journal article supplement (doi:10.1039/d1ra01225h), 2021-01-01
Supplement: d1ra01225h1.pdf [file d1ra01225h1.pdf]

## Supporting Information

### *Sulfur-Inserted Polymer-Anchored Edge Exfoliated Graphite for Durable Positive Electrode for Lithium-Sulfur Batteries*

*Nanami Uesugi<sup>1</sup>, Natsuho Kazahaya<sup>1</sup>, Koki Yamada<sup>1</sup>, Seiya Kojo<sup>1</sup>, Hiroshi Yoshitani<sup>2</sup>, Takuya Wada<sup>2</sup>, Hiroji Fukui<sup>2</sup>, Shoji Nozato<sup>2</sup>, Yu Katayama<sup>1\*</sup>, and Hiromori Tsutsumi<sup>1</sup>*

<sup>1</sup> *Department of Applied Chemistry, Graduate School of Sciences and Technology for Innovation, Yamaguchi University, Tokiwadai, Ube, 755-8611, Japan*

<sup>2</sup> *Advanced Technology Institute, Corporate R&D Center, Sekisui Chemical Co., Ltd., 2-1 Hyakuyama, Shimamoto-cho, Mishima-gun, Osaka 618-0021, Japan*

Table S1 Summary of the sulfur loading, initial capacity, capacity retention, and the sulfur loading methods of the state-of-the-art positive electrodes.

| Classification                              | Sulfur loading / wt. % | Initial capacity / mAh g <sup>-1</sup> | Capacity retention / % | Sulfur loading method                                                       |
|---------------------------------------------|------------------------|----------------------------------------|------------------------|-----------------------------------------------------------------------------|
| <b>Mesoporous carbon-S<sup>[1]</sup></b>    | 50                     | 1200                                   | 60@1 C, 100th cycle    | Sulfur melt adsorption                                                      |
| <b>Hollow carbon sphere-S<sup>[2]</sup></b> | 64                     | 1020                                   | 68@0.1 C, 100th cycle  | 400°C heat treatment                                                        |
| <b>CNT-S<sup>[3]</sup></b>                  | 75                     | 1560                                   | 47@0.2 C, 150th cycle  | Sulfur melt adsorption                                                      |
| <b>Graphene-S<sup>[4]</sup></b>             | 70(before annealing)   | 750                                    | 69@0.2 C, 100th cycle  | Emulsion: Na <sub>2</sub> S <sub>2</sub> O <sub>3</sub> + Triton-X100 + HCl |
| <b>Carbon black-S<sup>[5]</sup></b>         | 64.7                   | 1220                                   | 68@0.1 C, 50th cycle   | /                                                                           |

Table S2 Electrical conductivity of KB, G, ExG, and PPG-EExG.

|          | Electrical conductivity / S cm <sup>-1</sup> |
|----------|----------------------------------------------|
| KB       | 15.16                                        |
| G        | 466.4                                        |
| ExG      | 1777                                         |
| PPG-EExG | 240.7                                        |

Table S3 Brunauer-Emmett-Teller (BET) surface area of KB, G, ExG, and PPG-EExG.

|          | BET surface area / m <sup>2</sup> g <sup>-1</sup> |
|----------|---------------------------------------------------|
| KB       | 1226                                              |
| G        | 7.256                                             |
| ExG      | 27.34                                             |
| PPG-EExG | 151.5                                             |

Table S4 Mass loading of sulfur on the cathode, catalyst loading, and sulfur content calculated from TG curve for the catalyst in this study.

|                          | Mass loading of Sulfur / mg | Mass of catalyst / mg | Sulfur content / wt. % |
|--------------------------|-----------------------------|-----------------------|------------------------|
| <b>PPG-EExG-S(Mix)</b>   | 1.267                       | 1.75                  | 72                     |
| <b>G-S (Mix)</b>         | 1.867                       | 2.73                  | 69                     |
| <b>EG-S (Mix)</b>        | 2.267                       | 3.43                  | 66                     |
| <b>PPG-EExG-S (Chem)</b> | 0.607                       | 0.90                  | 67                     |
| <b>G-S (Chem)</b>        | 1.15                        | 1.80                  | 64                     |
| <b>EG-S (Chem)</b>       | 1.992                       | 2.90                  | 68                     |
| <b>KB-S (Chem)</b>       | 1.742                       | 2.60                  | 67                     |

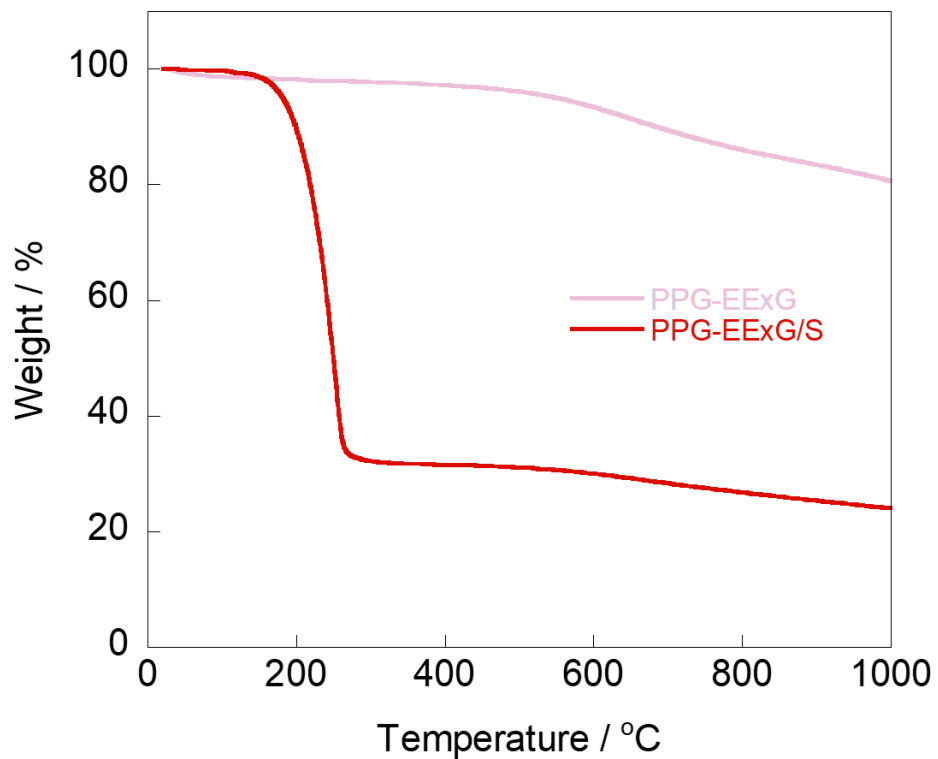

Figure S1 Thermogravimetric curves for PPG-EExG and PPG-EExG-S(chem) obtained under He atmosphere at a heating rate of  $20^{\circ}\text{C min}^{-1}$ . Weight loss observed above  $500^{\circ}\text{C}$  corresponds to the decomposition of the PPG anchor.

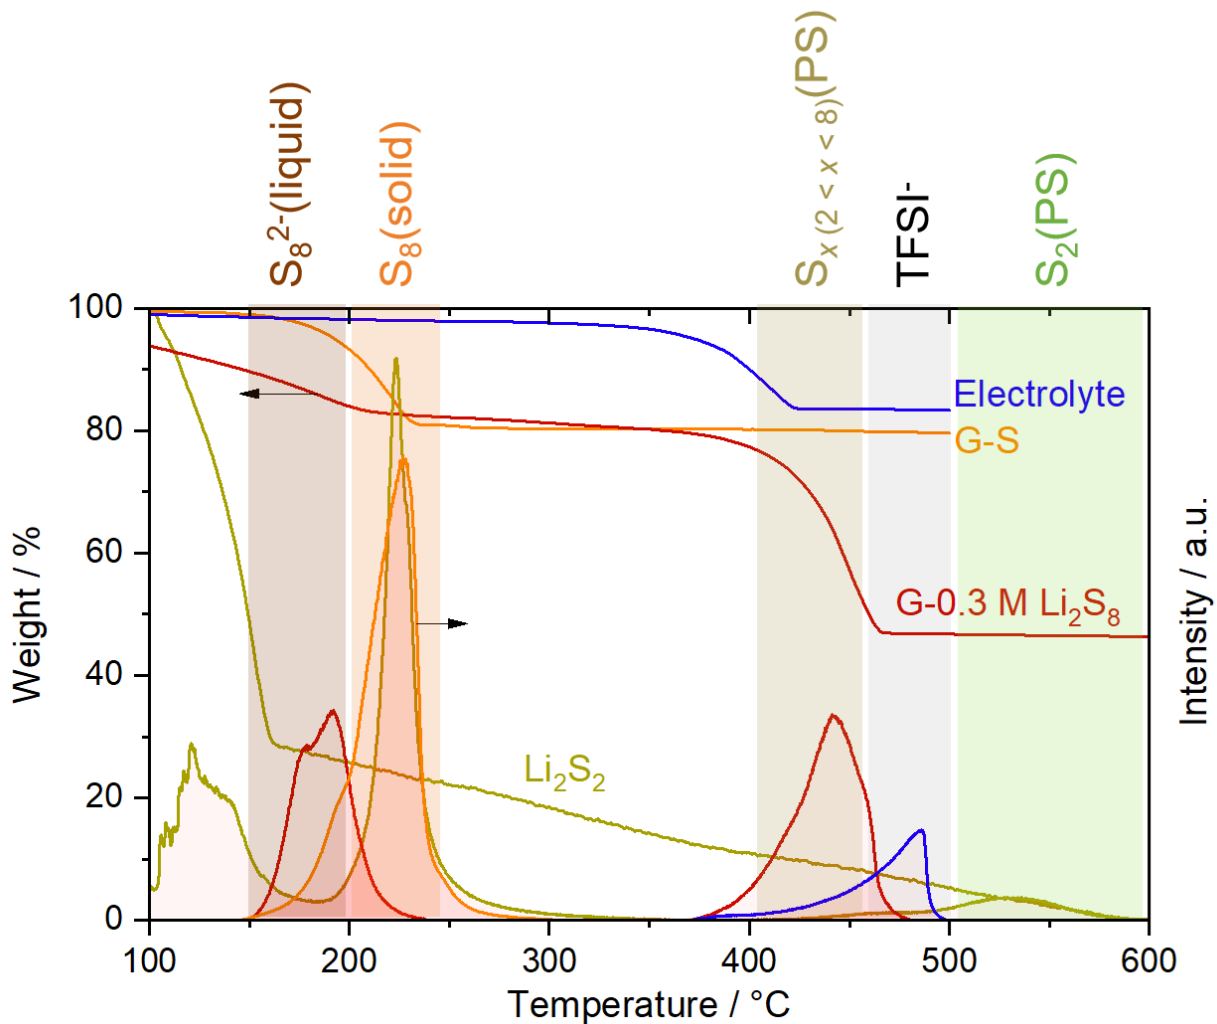

Figure S2 Gas chromatography-mass spectroscopy (GC-MS) curves for M/S = 64 of pure electrolyte (1 M LiTFSA in DME/DOL solution with 0.1 M LiNO<sub>3</sub> additive), G-S, G-0.3 M Li<sub>2</sub>S<sub>8</sub> (0.3 M Li<sub>2</sub>S<sub>8</sub> in 1 M LiTFSA in DME/DOL solution impregnated graphite electrode), and Li<sub>2</sub>S<sub>2</sub>. The corresponding thermogravimetric curve is also shown.

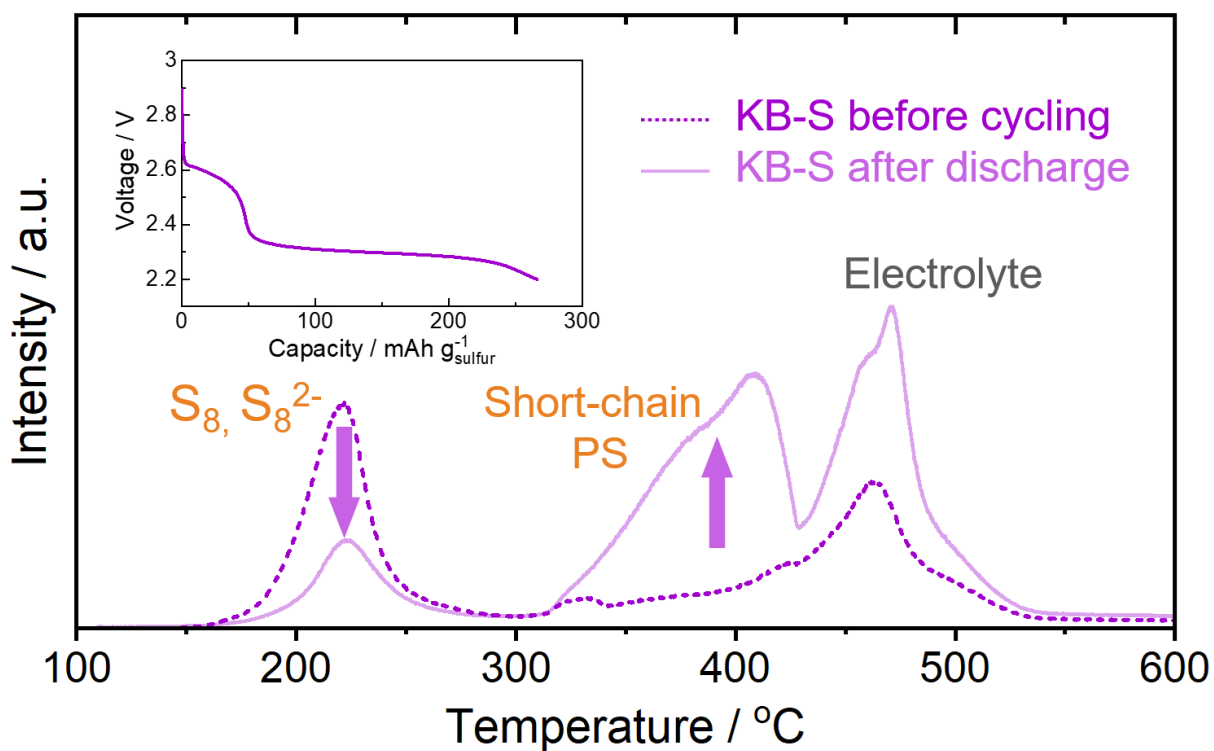

Figure S3 Gas chromatography-mass spectroscopy (GC-MS) curves for M/S = 64 of KB-S before and after the initial discharge process. Galvanostatic discharge measurements were performed in the potential range of 1.7–2.2 V at 30 °C. The corresponding discharge curve is shown in the inset.

References:

[1] Schuster, J. *et al. Angew. Chem. Int. Ed.* **2012**, 51, 3591–3595.

[2] Zhang, C. *et al. Angew. Chem. Int. Ed.* **2012**, 51, 9592.

[3] Zheng, G. *et al. Nano Lett.* **2011**, 11 , 4462.

[4] Wang, H. *et al. Nano Lett.* **2011**, 11 , 2644.

[5] Li, K. *et al. J. Power Sources.* **2012**, 202, 389.
